# Supplementary material for: A survey on the state of nanosafety research in the European Union and the United States
Source: PubMed Central journal article supplement (PMC6302049; doi:10.1007/s11051-018-4434-9), 2018-12-20
Supplement: 11051_2018_4434_MOESM1_ESM.pdf [file 11051_2018_4434_MOESM1_ESM.pdf]

# Q1 Your academic background

Answered: 82 Skipped: 2

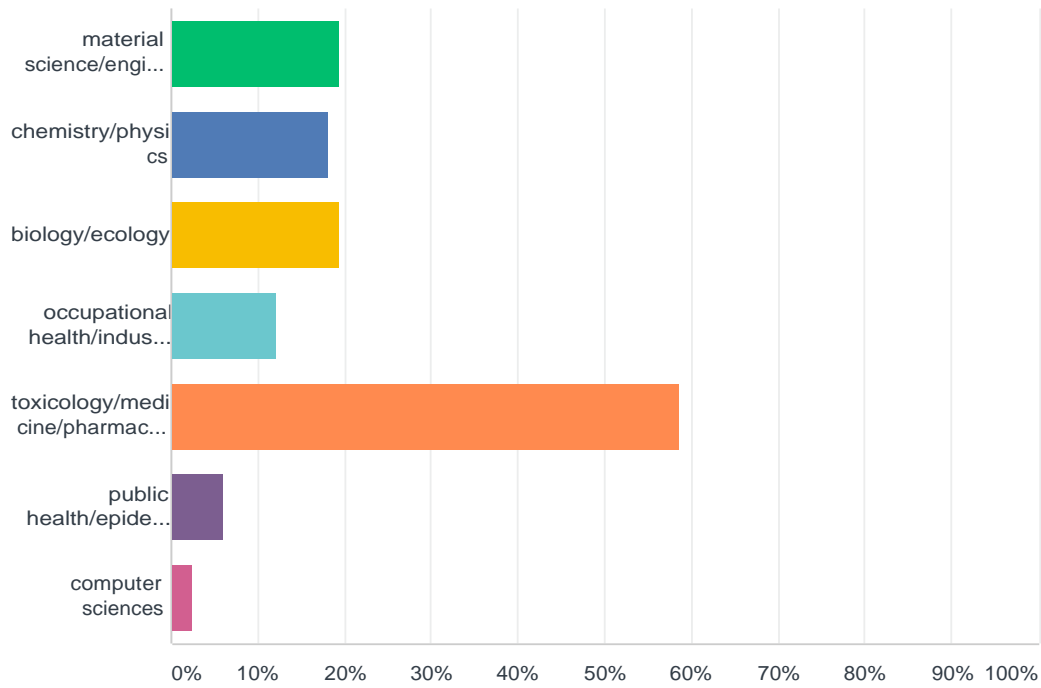

| ANSWER CHOICES                         | RESPONSES |    |
|----------------------------------------|-----------|----|
| material science/engineering           | 19.51%    | 16 |
| chemistry/physics                      | 18.29%    | 15 |
| biology/ecology                        | 19.51%    | 16 |
| occupational health/industrial hygiene | 12.20%    | 10 |
| toxicology/medicine/pharmacology       | 58.54%    | 48 |
| public health/epidemiology             | 6.10%     | 5  |
| computer sciences                      | 2.44%     | 2  |
| Total Respondents: 82                  |           |    |

| # | OTHER (SPECIFY)                  | DATE |
|---|----------------------------------|------|
| 1 | Environmental Engineering        |      |
| 2 | risk analysis/enviro engineering |      |
| 3 | Biochemistry                     |      |
| 4 | physiology                       |      |
| 5 | biochemistry                     |      |

## Q2 Your investigations involve the following exposure pathways:

Answered: 84 Skipped: 0

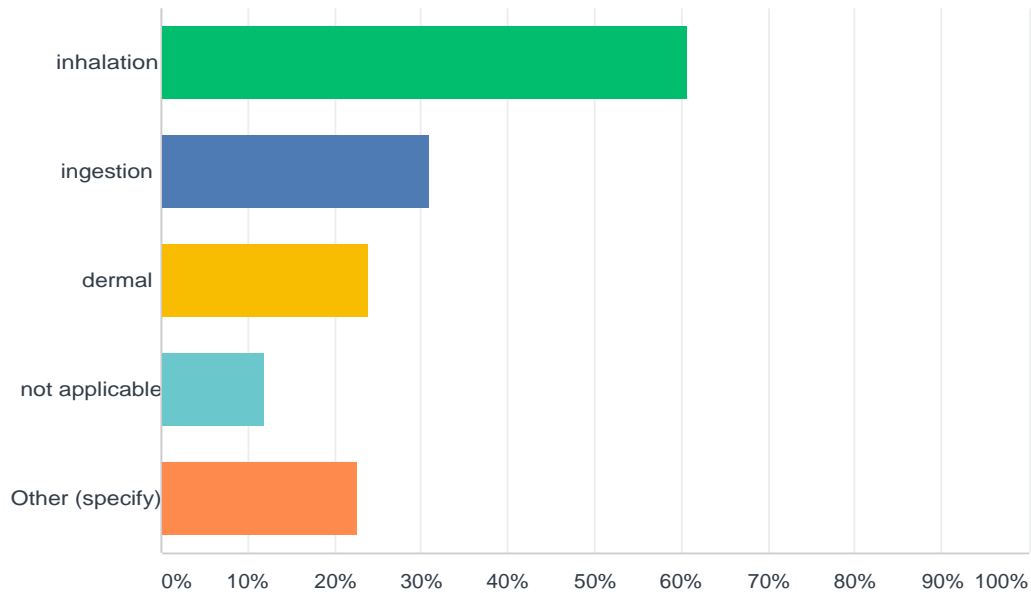

| ANSWER CHOICES        | RESPONSES |
|-----------------------|-----------|
| inhalation            | 60.71% 51 |
| ingestion             | 30.95% 26 |
| dermal                | 23.81% 20 |
| not applicable        | 11.90% 10 |
| Other (specify)       | 22.62% 19 |
| Total Respondents: 84 |           |

| #  | OTHER (SPECIFY)                                                                                  | DATE |
|----|--------------------------------------------------------------------------------------------------|------|
| 1  | systems toxicology                                                                               |      |
| 2  | injection                                                                                        |      |
| 3  | bacteria and aquatic organisms for environmentally relevant exposures, impacts, and applications |      |
| 4  | in vitro                                                                                         |      |
| 5  | Developmental exposures                                                                          |      |
| 6  | intravenous                                                                                      |      |
| 7  | in vitro mammalian assays, aqueous exposure to environmental organisms, microbial cells          |      |
| 8  | wastewater treatment                                                                             |      |
| 9  | freshwater systems                                                                               |      |
| 10 | systemic                                                                                         |      |
| 11 | intracoronary                                                                                    |      |
| 12 | injection                                                                                        |      |
| 13 | parenteral                                                                                       |      |

---

|    |                  |
|----|------------------|
| 14 | iv               |
| 15 | in vitro         |
| 16 | Intravenous      |
| 17 | In Vitro         |
| 18 | intravenous      |
| 19 | blood contacting |

---

### Q3 Types of nanomaterials under investigation

Answered: 84 Skipped: 0

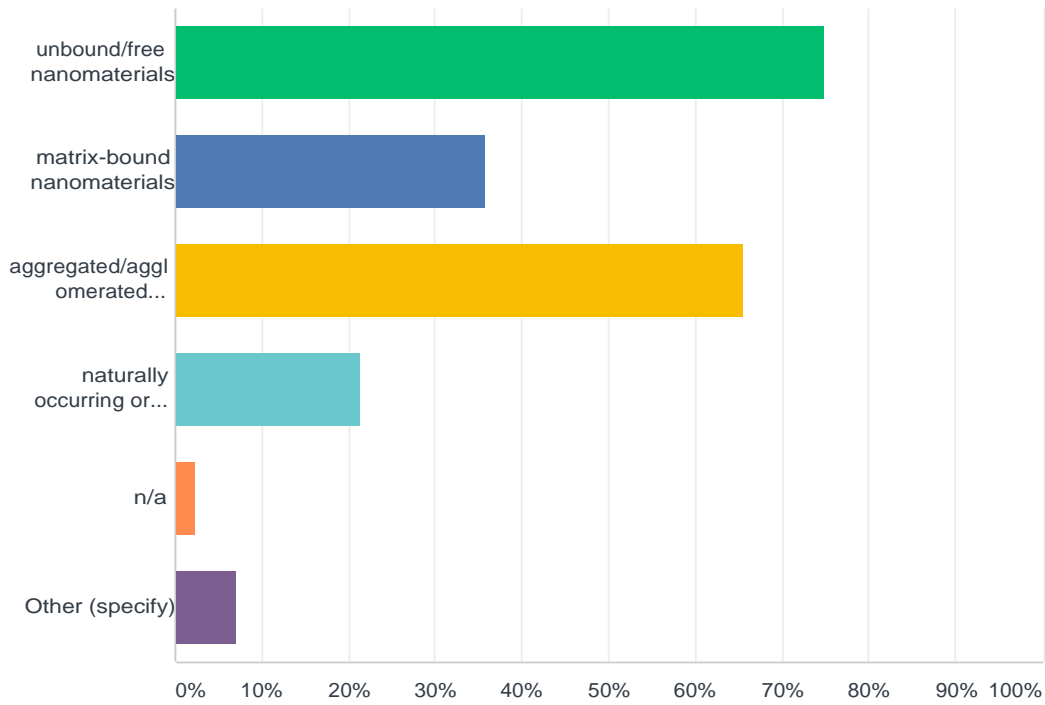

| ANSWER CHOICES                                  | RESPONSES |    |
|-------------------------------------------------|-----------|----|
| unbound/free nanomaterials                      | 75.00%    | 63 |
| matrix-bound nanomaterials                      | 35.71%    | 30 |
| aggregated/agglomerated nanomaterials           | 65.48%    | 55 |
| naturally occurring or incidental nanomaterials | 21.43%    | 18 |
| n/a                                             | 2.38%     | 2  |
| Other (specify)                                 | 7.14%     | 6  |
| Total Respondents: 84                           |           |    |

| # | OTHER (SPECIFY)                       | DATE |
|---|---------------------------------------|------|
| 1 | reusing (open) data                   |      |
| 2 | Metals nanoparticles                  |      |
| 3 | engineered nanoparticles              |      |
| 4 | environmental transformation products |      |
| 5 | Carbon nanomaterials                  |      |
| 6 | nanomaterials in solution             |      |

## Q4 What investigative methods do you use?

Answered: 84 Skipped: 0

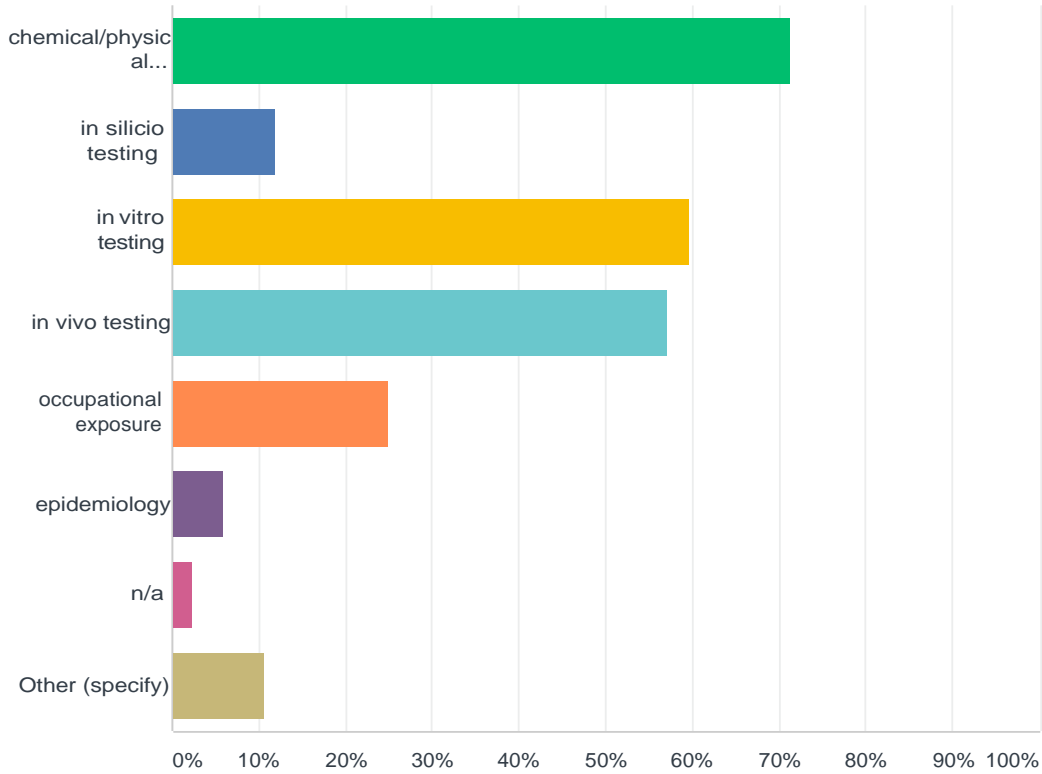

| ANSWER CHOICES                     | RESPONSES |    |
|------------------------------------|-----------|----|
| chemical/physical characterization | 71.43%    | 60 |
| in silicio testing                 | 11.90%    | 10 |
| in vitro testing                   | 59.52%    | 50 |
| in vivo testing                    | 57.14%    | 48 |
| occupational exposure              | 25.00%    | 21 |
| epidemiology                       | 5.95%     | 5  |
| n/a                                | 2.38%     | 2  |
| Other (specify)                    | 10.71%    | 9  |
| Total Respondents: 84              |           |    |

| # | OTHER (SPECIFY)           | DATE |
|---|---------------------------|------|
| 1 | data integration          |      |
| 2 | Simulation of product use |      |
| 3 | risk analysis model       |      |
| 4 | literature review         |      |
| 5 | mesocosms                 |      |
| 6 | clinical toxicology       |      |

---

|   |                                                        |
|---|--------------------------------------------------------|
| 7 | Zebrafish                                              |
| 8 | review for regulatory acceptance; protocol development |
| 9 | risk assessment                                        |

---

## Q5 What biologic/toxic effects do you investigate?

Answered: 84 Skipped: 0

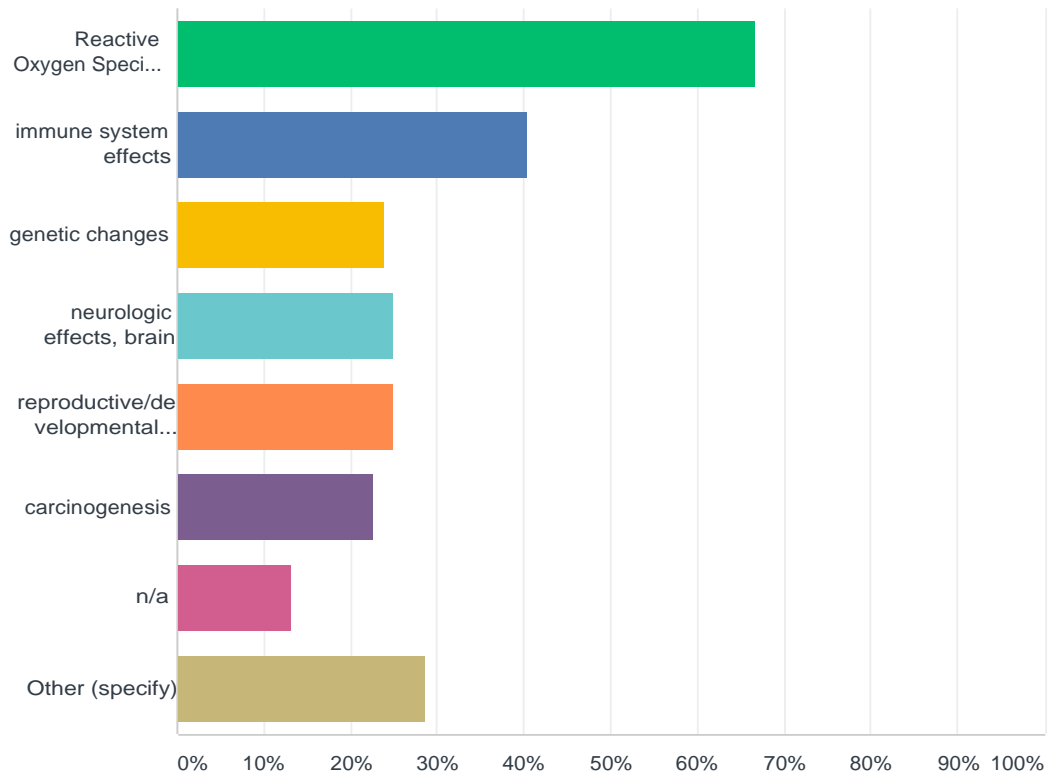

| ANSWER CHOICES                     | RESPONSES |
|------------------------------------|-----------|
| Reactive Oxygen Species (ROS)      | 66.67% 56 |
| immune system effects              | 40.48% 34 |
| genetic changes                    | 23.81% 20 |
| neurologic effects, brain          | 25.00% 21 |
| reproductive/developmental effects | 25.00% 21 |
| carcinogenesis                     | 22.62% 19 |
| n/a                                | 13.10% 11 |
| Other (specify)                    | 28.57% 24 |
| Total Respondents: 84              |           |

| # | OTHER (SPECIFY)                                                                                             | DATE |
|---|-------------------------------------------------------------------------------------------------------------|------|
| 1 | any effect is relevant                                                                                      |      |
| 2 | cell death (bacteria), organism death (e.g., embryonic zebrafish), biomolecule reactions (e.g. glutathione) |      |
| 3 | Systemic                                                                                                    |      |
| 4 | cell growth and NP uptake                                                                                   |      |
| 5 | effects to microbial communities                                                                            |      |

|    |                                                                                    |
|----|------------------------------------------------------------------------------------|
| 6  | NP toxic effects in fluvial biofilms at molecular, functional and structural level |
| 7  | digestive impairment                                                               |
| 8  | effects to function of engineered systems                                          |
| 9  | physiological responses                                                            |
| 10 | cardiovascular                                                                     |
| 11 | histopathological changes                                                          |
| 12 | cardiovascular                                                                     |
| 13 | Developmental morphology and Molecular responses                                   |
| 14 | lung diseases                                                                      |
| 15 | pharmacokinetics                                                                   |
| 16 | Microbiome interactions                                                            |
| 17 | Regulatory requirements                                                            |
| 18 | cardiovascular                                                                     |
| 19 | cardiovascular effects                                                             |
| 20 | systemic effects                                                                   |
| 21 | Fibrosis                                                                           |
| 22 | inflammation, ADME                                                                 |
| 23 | cardiovascular                                                                     |
| 24 | vascular                                                                           |



# Q6 What are the potential applications for the nanomaterials you are investigating?

Answered: 84 Skipped: 0

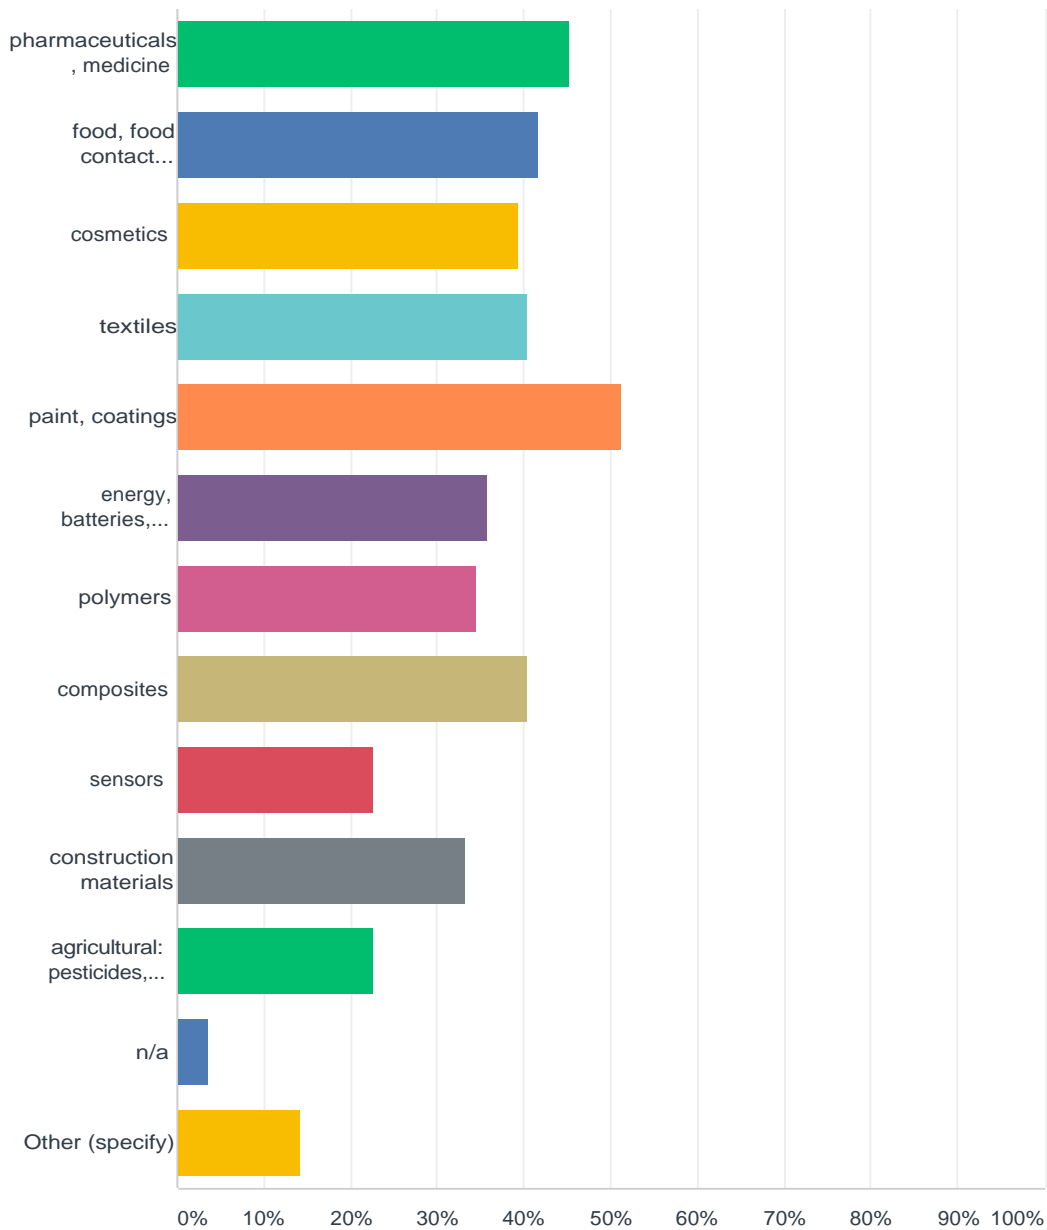

| ANSWER CHOICES               | RESPONSES |    |
|------------------------------|-----------|----|
| pharmaceuticals, medicine    | 45.24%    | 38 |
| food, food contact materials | 41.67%    | 35 |
| cosmetics                    | 39.29%    | 33 |
| textiles                     | 40.48%    | 34 |
| paint, coatings              | 51.19%    | 43 |

|                                          |        |    |
|------------------------------------------|--------|----|
| energy, batteries, electronics           | 35.71% | 30 |
| polymers                                 | 34.52% | 29 |
| composites                               | 40.48% | 34 |
| sensors                                  | 22.62% | 19 |
| construction materials                   | 33.33% | 28 |
| agricultural: pesticides, soil amendment | 22.62% | 19 |
| n/a                                      | 3.57%  | 3  |
| Other (specify)                          | 14.29% | 12 |
| Total Respondents: 84                    |        |    |

| #  | OTHER (SPECIFY)                                             | DATE |
|----|-------------------------------------------------------------|------|
| 1  | water                                                       |      |
| 2  | water treatment                                             |      |
| 3  | Water treatment                                             |      |
| 4  | Light                                                       |      |
| 5  | water treatment                                             |      |
| 6  | nano in waste stream                                        |      |
| 7  | environmental waste (waste water treatment plant effluents) |      |
| 8  | newly developed nanomaterials                               |      |
| 9  | alloys                                                      |      |
| 10 | Petroleum additives                                         |      |
| 11 | medical devices                                             |      |
| 12 | construction material, aerospace/automobile composite       |      |

# Q7 How do you report dose/concentration in your experiments?

Answered: 84 Skipped: 0

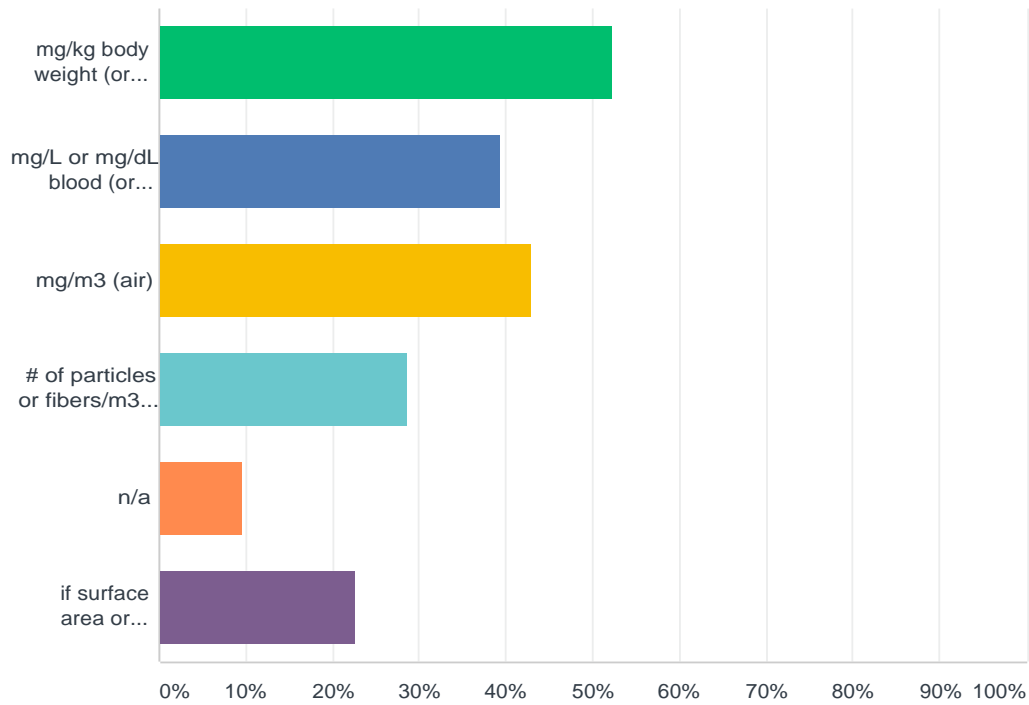

| ANSWER CHOICES                                   | RESPONSES |    |
|--------------------------------------------------|-----------|----|
| mg/kg body weight (or similar)                   | 52.38%    | 44 |
| mg/L or mg/dL blood (or similar)                 | 39.29%    | 33 |
| mg/m3 (air)                                      | 42.86%    | 36 |
| # of particles or fibers/m3 (air)                | 28.57%    | 24 |
| n/a                                              | 9.52%     | 8  |
| if surface area or reactivity or other, specify: | 22.62%    | 19 |
| Total Respondents: 84                            |           |    |

| # | IF SURFACE AREA OR REACTIVITY OR OTHER, SPECIFY:                                                         | DATE |
|---|----------------------------------------------------------------------------------------------------------|------|
| 1 | we use what is appropriate for the material                                                              |      |
| 2 | surface area                                                                                             |      |
| 3 | Particle size                                                                                            |      |
| 4 | surface area                                                                                             |      |
| 5 | Surface area                                                                                             |      |
| 6 | particles/volume                                                                                         |      |
| 7 | surface area, lung deposited surface area, attempts on reactivity, but w/o success at this point in time |      |
| 8 | ug/L                                                                                                     |      |
| 9 | mg/cm2 for in vitro (or #/cm2)                                                                           |      |

---

|    |                                                  |
|----|--------------------------------------------------|
| 10 | surface area                                     |
| 11 | mg/m <sup>2</sup>                                |
| 12 | ug/ml in vitro, modeled deposition to cell layer |
| 13 | Surface area and particle number                 |
| 14 | surface area                                     |
| 15 | many dose metrics evaluated                      |
| 16 | sa                                               |
| 17 | surface area                                     |
| 18 | in vitro dose is microgram per cm <sup>2</sup>   |
| 19 | ppb                                              |

---

## Q8 How do you determine the range for dose or concentration in your toxicity experiments?

Answered: 84 Skipped: 0

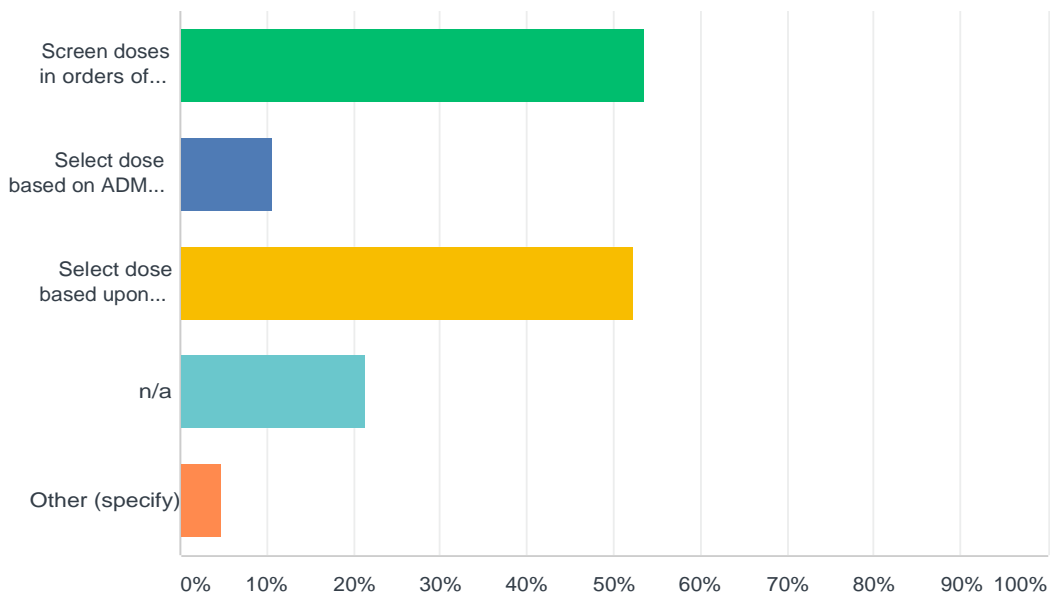

| ANSWER CHOICES                                                                                                                    | RESPONSES |    |
|-----------------------------------------------------------------------------------------------------------------------------------|-----------|----|
| Screen doses in orders of magnitude until effects are seen                                                                        | 53.57%    | 45 |
| Select dose based on ADME (adsorption, distribution, metabolism, excretion) models for organs from which the cell line is derived | 10.71%    | 9  |
| Select dose based upon reported concentrations in products or environmental media                                                 | 52.38%    | 44 |
| n/a                                                                                                                               | 21.43%    | 18 |
| Other (specify)                                                                                                                   | 4.76%     | 4  |
| Total Respondents: 84                                                                                                             |           |    |

| # | OTHER (SPECIFY)                                                                                    | DATE |
|---|----------------------------------------------------------------------------------------------------|------|
| 1 | Relevant doses/exposure concentrations considering conversion of existing OELs as a starting point |      |
| 2 | equivalent human dosage related to occupational exposures                                          |      |
| 3 | Combination of literature review, followed by concentration responses to optimize the ranges used  |      |
| 4 | occupational exposure levels or levels reported in the literature for reference materials          |      |

### Q9 Are you trying to find a "threshold" dose or concentration?

Answered: 83 Skipped: 1

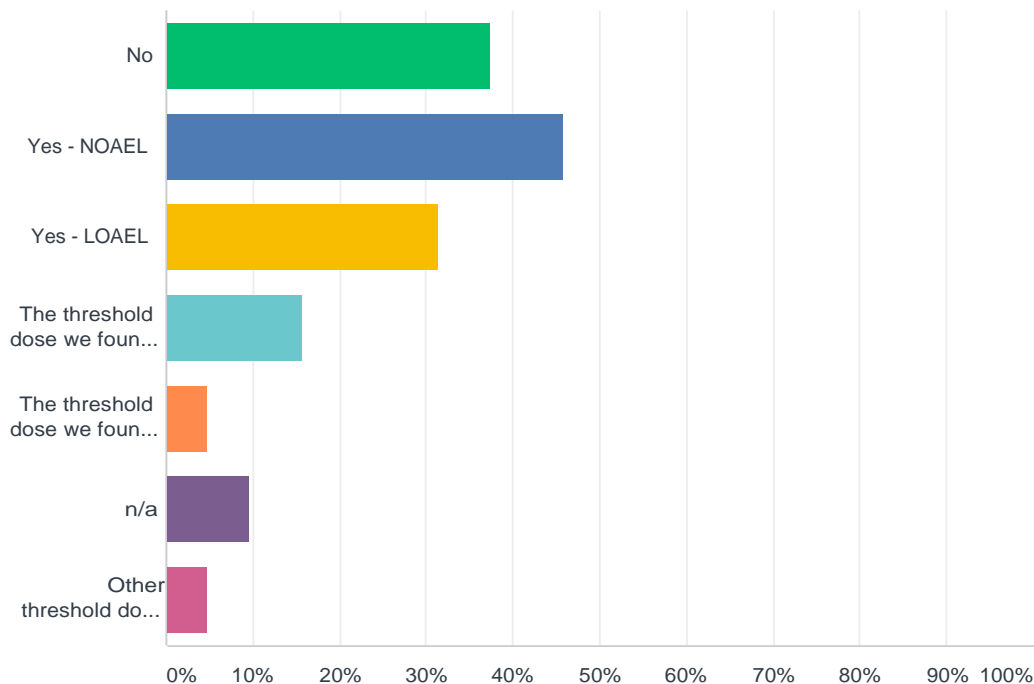

| ANSWER CHOICES                                                  | RESPONSES |    |
|-----------------------------------------------------------------|-----------|----|
| No                                                              | 37.35%    | 31 |
| Yes - NOAEL                                                     | 45.78%    | 38 |
| Yes - LOAEL                                                     | 31.33%    | 26 |
| The threshold dose we found is different from the bulk material | 15.66%    | 13 |
| The threshold dose we found is similar to the bulk material     | 4.82%     | 4  |
| n/a                                                             | 9.64%     | 8  |
| Other threshold dose or concentration:                          | 4.82%     | 4  |
| Total Respondents: 83                                           |           |    |

| # | OTHER THRESHOLD DOSE OR CONCENTRATION:                                                           | DATE |
|---|--------------------------------------------------------------------------------------------------|------|
| 1 | sometimes; when the focus is on the material, comparative magnitude impact for same dose is used |      |
| 2 | BMD/BMDL                                                                                         |      |
| 3 | Depends on the study                                                                             |      |
| 4 | Bulk concentration vs % nanoparticles in airborne material                                       |      |

Q10 "Benchmark materials" are defined here as a standard by which other materials can be compared or judged. To help identify "benchmark materials" for specific classes of nanomaterials, please rate the following criteria:high production volume

Answered: 81 Skipped: 3

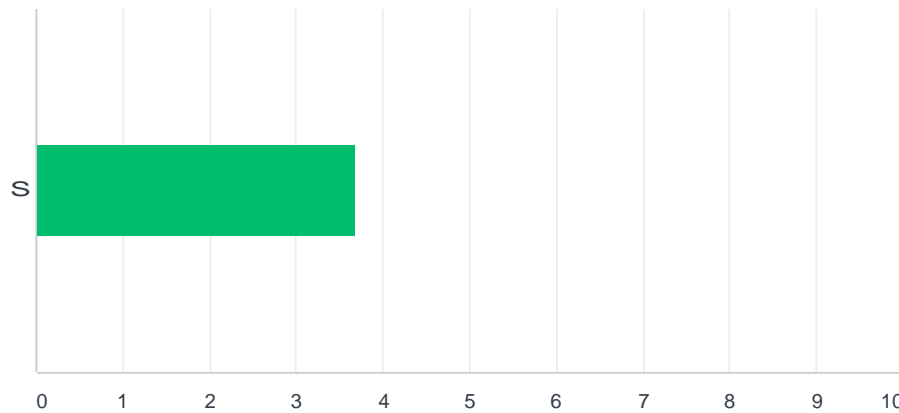

|   | NOT IMPORTANT | (NO LABEL) | (NO LABEL)   | (NO LABEL)   | VERY IMPORTANT | N/A        | TOTAL | WEIGHTED AVERAGE |
|---|---------------|------------|--------------|--------------|----------------|------------|-------|------------------|
| S | 11.11%<br>9   | 8.64%<br>7 | 16.05%<br>13 | 22.22%<br>18 | 37.04%<br>30   | 4.94%<br>4 | 81    | 3.69             |

### Q11 nanomaterial size

Answered: 83 Skipped: 1

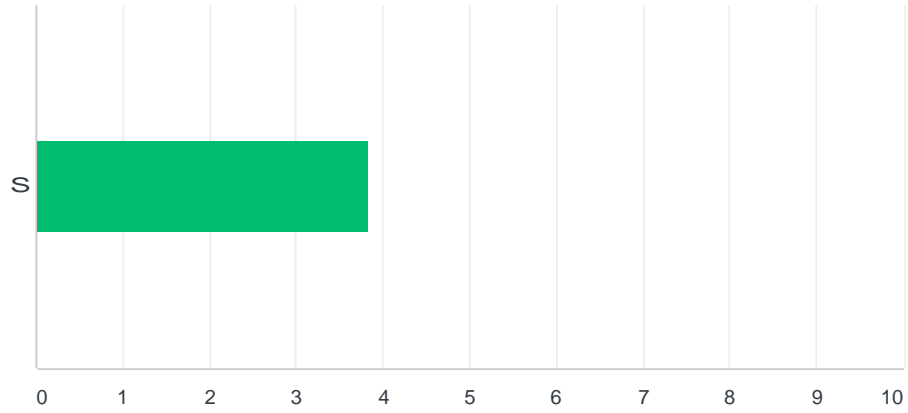

|   | 1          | 2          | 3            | 4            | 5            | TOTAL | WEIGHTED AVERAGE |
|---|------------|------------|--------------|--------------|--------------|-------|------------------|
| S | 2.41%<br>2 | 9.64%<br>8 | 14.46%<br>12 | 49.40%<br>41 | 24.10%<br>20 | 83    | 3.83             |



### Q12 nanomaterial shape

Answered: 83 Skipped: 1

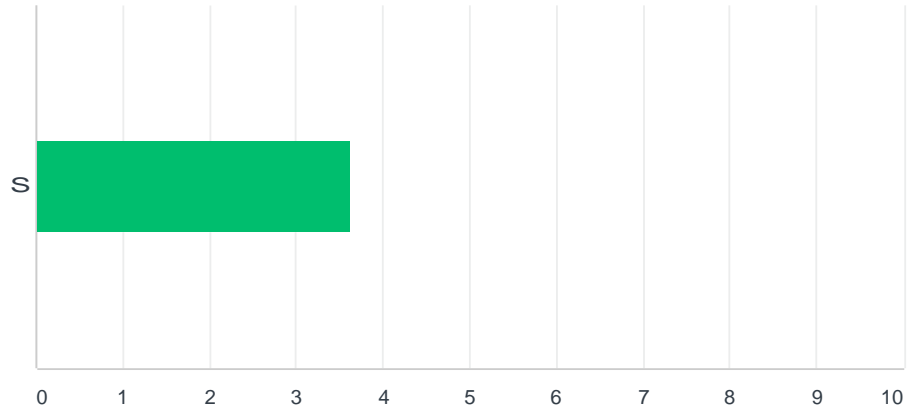

|   | 1          | 2            | 3            | 4            | 5            | TOTAL | WEIGHTED AVERAGE |
|---|------------|--------------|--------------|--------------|--------------|-------|------------------|
| S | 3.61%<br>3 | 15.66%<br>13 | 18.07%<br>15 | 40.96%<br>34 | 21.69%<br>18 | 83    | 3.61             |

### Q13 nanomaterial class (organic, metal, hybrid)

Answered: 80 Skipped: 4

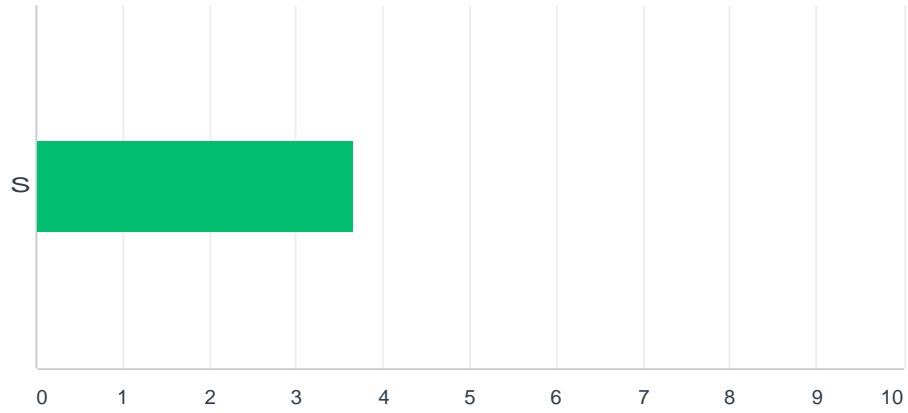

|   | 1          | 2          | 3            | 4            | 5            | TOTAL | WEIGHTED AVERAGE |
|---|------------|------------|--------------|--------------|--------------|-------|------------------|
| S | 7.50%<br>6 | 8.75%<br>7 | 15.00%<br>12 | 46.25%<br>37 | 22.50%<br>18 | 80    | 3.67             |

### Q14 exposure to consumers

Answered: 81 Skipped: 3



|   | 1            | 2          | 3            | 4            | 5            | TOTAL | WEIGHTED AVERAGE |
|---|--------------|------------|--------------|--------------|--------------|-------|------------------|
| S | 12.35%<br>10 | 4.94%<br>4 | 16.05%<br>13 | 37.04%<br>30 | 29.63%<br>24 | 81    | 3.67             |

### Q15 most toxic effect seen

Answered: 83 Skipped: 1

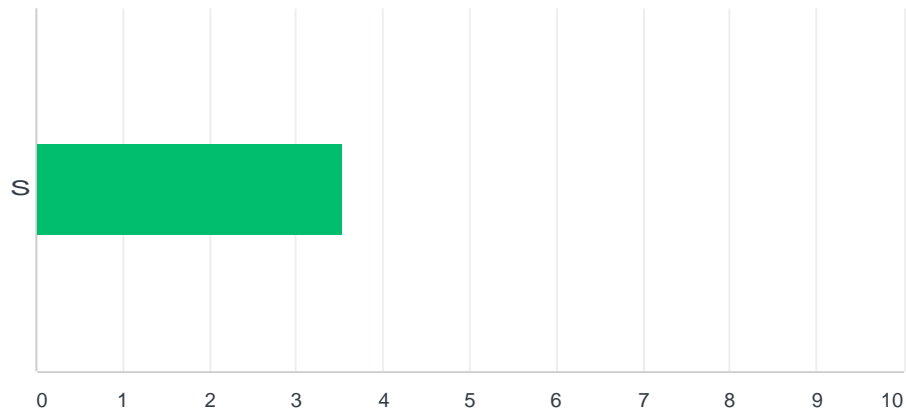

|   | 1          | 2          | 3            | 4            | 5            | TOTAL | WEIGHTED AVERAGE |
|---|------------|------------|--------------|--------------|--------------|-------|------------------|
| S | 8.43%<br>7 | 6.02%<br>5 | 26.51%<br>22 | 40.96%<br>34 | 18.07%<br>15 | 83    | 3.54             |

| # | OTHER CRITERIA:                                                                                               | DATE |
|---|---------------------------------------------------------------------------------------------------------------|------|
| 1 | bulk counterpart, if available                                                                                |      |
| 2 | Surface chemistry, agglomeration state                                                                        |      |
| 3 | It is important that it is a well-known material that all can relate to                                       |      |
| 4 | Dissolution rates                                                                                             |      |
| 5 | stability over time including during storage                                                                  |      |
| 6 | commercial product that has consistent physical and chemical characteristics across different production lots |      |
| 7 | Amount of published literature; availability                                                                  |      |
| 8 | Significant toxicology database                                                                               |      |

## Q16 Urgency to address the following topics:

Answered: 84 Skipped: 0

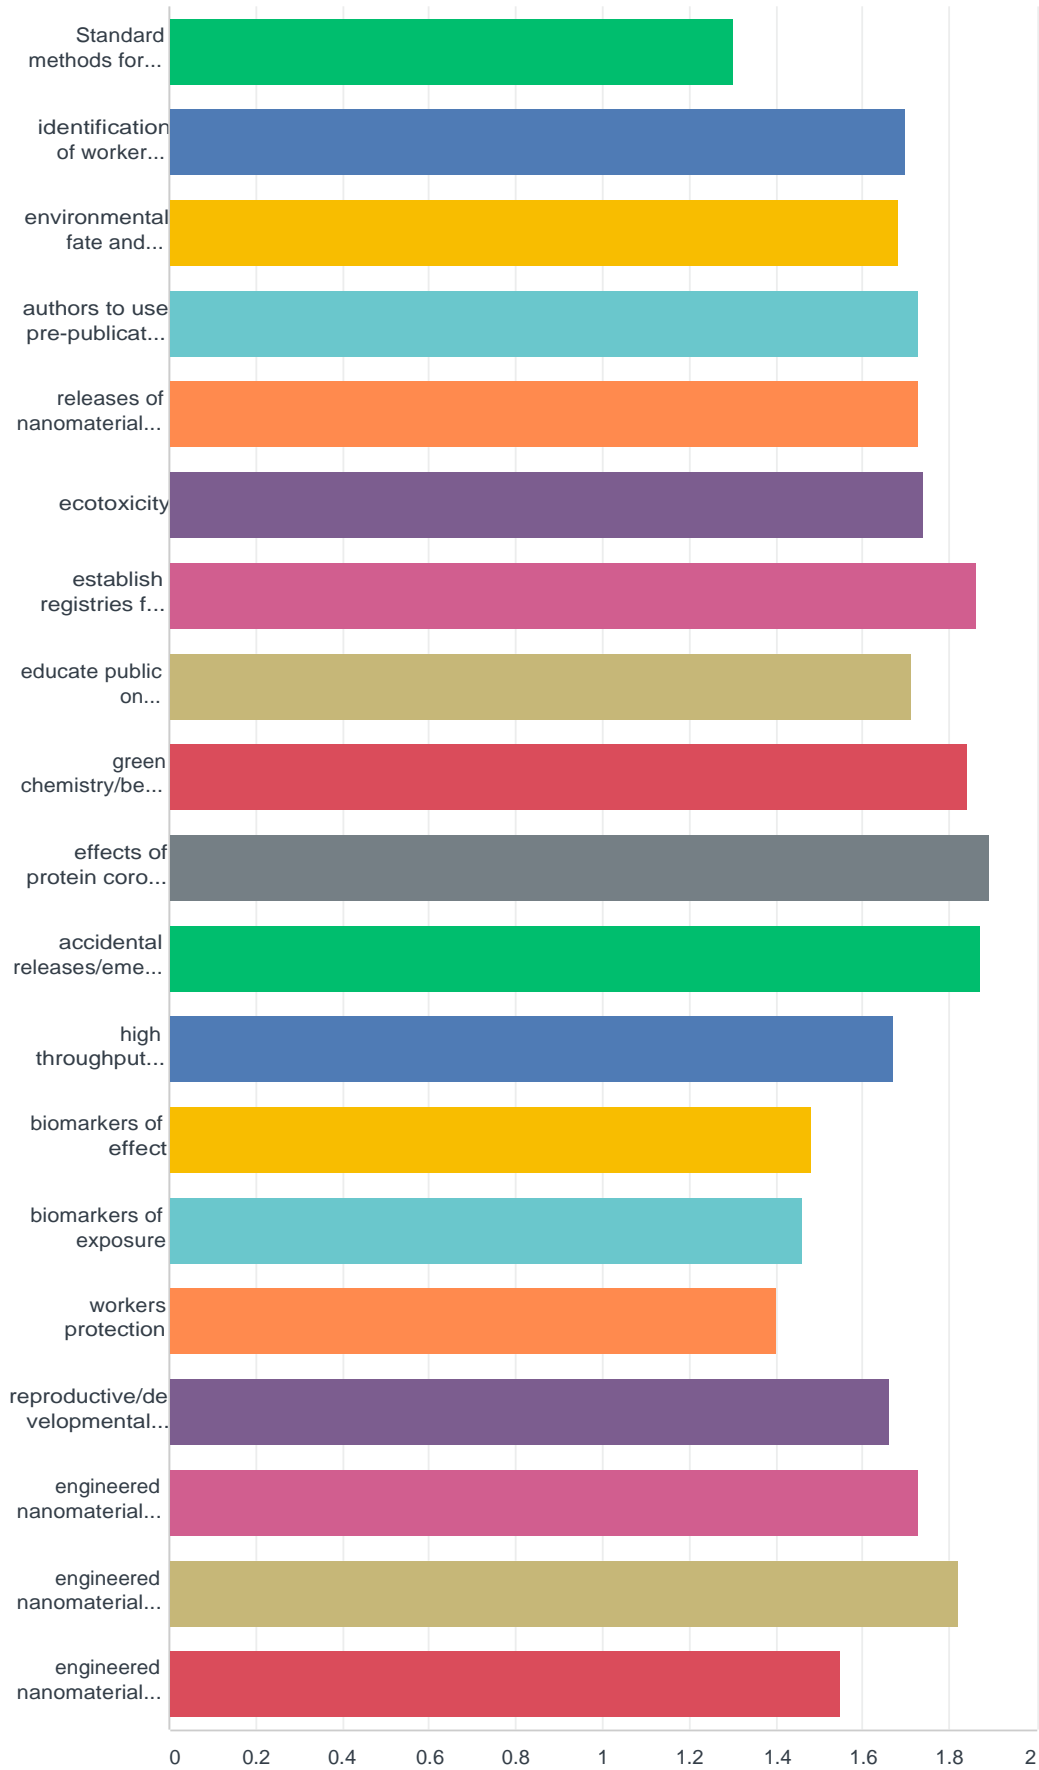

|                                                                                      | VERY URGENT  | SOMEWHAT URGENT | NOT URGENT   | TOTAL | WEIGHTED AVERAGE |
|--------------------------------------------------------------------------------------|--------------|-----------------|--------------|-------|------------------|
| Standard methods for toxicity testing                                                | 71.08%<br>59 | 27.71%<br>23    | 1.20%<br>1   | 83    | 1.30             |
| identification of worker cohorts to conduct prospective studies                      | 41.67%<br>35 | 46.43%<br>39    | 11.90%<br>10 | 84    | 1.70             |
| environmental fate and transport                                                     | 43.21%<br>35 | 45.68%<br>37    | 11.11%<br>9  | 81    | 1.68             |
| authors to use pre-publication checklist or criteria to publish reproducible results | 41.46%<br>34 | 43.90%<br>36    | 14.63%<br>12 | 82    | 1.73             |
| releases of nanomaterials from aging matrices                                        | 38.55%<br>32 | 49.40%<br>41    | 12.05%<br>10 | 83    | 1.73             |
| ecotoxicity                                                                          | 38.27%<br>31 | 49.38%<br>40    | 12.35%<br>10 | 81    | 1.74             |
| establish registries for nano workers                                                | 34.57%<br>28 | 44.44%<br>36    | 20.99%<br>17 | 81    | 1.86             |
| educate public on uncertainties/benefits of nanotechnology                           | 41.25%<br>33 | 46.25%<br>37    | 12.50%<br>10 | 80    | 1.71             |
| green chemistry/benign by design                                                     | 34.57%<br>28 | 46.91%<br>38    | 18.52%<br>15 | 81    | 1.84             |
| effects of protein corona on toxic effects                                           | 36.59%<br>30 | 37.80%<br>31    | 25.61%<br>21 | 82    | 1.89             |
| accidental releases/emergency response                                               | 25.61%<br>21 | 62.20%<br>51    | 12.20%<br>10 | 82    | 1.87             |
| high throughput screening tools                                                      | 48.78%<br>40 | 35.37%<br>29    | 15.85%<br>13 | 82    | 1.67             |
| biomarkers of effect                                                                 | 59.76%<br>49 | 32.93%<br>27    | 7.32%<br>6   | 82    | 1.48             |
| biomarkers of exposure                                                               | 57.83%<br>48 | 38.55%<br>32    | 3.61%<br>3   | 83    | 1.46             |
| workers protection                                                                   | 64.63%<br>53 | 30.49%<br>25    | 4.88%<br>4   | 82    | 1.40             |
| reproductive/developmental toxicity                                                  | 40.00%<br>32 | 53.75%<br>43    | 6.25%<br>5   | 80    | 1.66             |
| engineered nanomaterials in food products                                            | 45.00%<br>36 | 37.50%<br>30    | 17.50%<br>14 | 80    | 1.73             |
| engineered nanomaterials in environmental media                                      | 31.71%<br>26 | 54.88%<br>45    | 13.41%<br>11 | 82    | 1.82             |
| engineered nanomaterials in human tissues                                            | 50.00%<br>41 | 45.12%<br>37    | 4.88%<br>4   | 82    | 1.55             |

| # | OTHER (PLEASE SPECIFY)                                                                                                                                                                                                                                                                                                                                     | DATE |
|---|------------------------------------------------------------------------------------------------------------------------------------------------------------------------------------------------------------------------------------------------------------------------------------------------------------------------------------------------------------|------|
| 1 | Criteria for grouping and read across, occupational exposure limits, government approval of tools                                                                                                                                                                                                                                                          |      |
| 2 | A lot of more important topics are not included here: research that enables generalization within hazard estimation (omics, AOPs, MIE), predictive estimation of hazards and exposure and "validation", exposure measurement technologies, occupational exposure characteristics and levels, innovation risk governance of NM and NM-enabled products .... |      |
| 3 | Disposal of nanomaterials containing products                                                                                                                                                                                                                                                                                                              |      |
| 4 | Immunotoxicity of Nanomaterials                                                                                                                                                                                                                                                                                                                            |      |
